# Supplementary material for: Metabolic Adaptations in Rapeseed: Hemin-Induced Resilience to NaCl Stress by Enhancing Growth, Photosynthesis, and Cellular Defense Ability
Source: MDPI journal article supplement (doi:10.3390/metabo14010057), 2024-01-15
Supplement: s1 [file s1]

Table S1: Effect of hemin soaking on the seedling emergence rate (%) of HYZ62 and 158R under NaCl stress

| Treatments  | Huayouza 62 | 158r  |
|-------------|-------------|-------|
| Control     | 0.818       | 0.705 |
| Hemin       | 0.890       | 0.870 |
| 0.3%S       | 0.655       | 0.691 |
| Hemin+0.3%S | 0.825       | 0.700 |
| 0.6%S       | 0.850       | 0.736 |
| Hemin+0.6%S | 0.915       | 0.900 |
| 1.2%S       | 0.540       | 0.390 |
| Hemin+1.2%S | 0.710       | 0.565 |

Table S2:Effect of hemin soaking on fresh weight of HYZ62 and 158R under NaCl stress

| Index                           | Treatments  | Huayouza 62    |                 |                 | 158R            |                 |                 |
|---------------------------------|-------------|----------------|-----------------|-----------------|-----------------|-----------------|-----------------|
|                                 |             | 14             | 17              | 20              | 14              | 17              | 20              |
| Shoot<br>fresh<br>weight<br>(g) | Control     | 1.3240±0.0782e | 1.7757±0.0553ef | 2.3227±0.0863c  | 1.2217±0.0919cd | 1.8760±0.0354d  | 2.6750±0.0922cd |
|                                 | Hemin       | 1.1387±0.0251d | 1.8523±0.0263f  | 1.8950±0.0824b  | 1.4090±0.0625d  | 2.0623±0.0048d  | 2.9303±0.0468de |
|                                 | 0.3%S       | 0.9120±0.0565c | 1.5480±0.0600d  | 2.7043±0.1077d  | 1.2350±0.0185cd | 2.0073±0.0552d  | 2.5813±0.1875cd |
|                                 | Hemin+0.3%S | 1.0447±0.0358d | 1.6803±0.0596de | 2.3417±0.1181c  | 1.1553±0.0120c  | 1.5520±0.0620c  | 3.2713±0.1118e  |
|                                 | 0.6%S       | 0.7467±0.0054b | 1.1483±0.0171a  | 2.0803±0.1696bc | 0.7917±0.0297b  | 1.1240±0.0100a  | 2.0527±0.0238b  |
|                                 | Hemin+0.6%S | 0.7510±0.0182b | 1.3300±0.0083c  | 2.1100±0.0778bc | 0.7783±0.0113b  | 1.5150±0.0752c  | 2.3423±0.0231bc |
|                                 | 1.2%S       | 0.4693±0.0073a | 1.1797±0.0691ab | 1.1413±0.0326a  | 0.5093±0.0057a  | 1.2010±0.0050ab | 1.3400±0.0576a  |
|                                 | Hemin+1.2%S | 0.5490±0.0197a | 1.2943±0.0198bc | 1.3543±0.0177a  | 0.7660±0.0402b  | 1.3963±0.0317bc | 2.4067±0.0925bc |
| Root<br>fresh<br>weight<br>(g)  | Control     | 0.1317±0.0015d | 0.1540±0.0045d  | 0.3200±0.0090de | 0.1340±0.0066bc | 0.1513±0.0018a  | 0.2843±0.0048c  |
|                                 | Hemin       | 0.1820±0.0057e | 0.1760±0.0122e  | 0.3517±0.0106e  | 0.2097±0.0168d  | 0.1850±0.0067bc | 0.3687±0.0124de |
|                                 | 0.3%S       | 0.1017±0.0035c | 0.1283±0.0091c  | 0.2720±0.0520cd | 0.1263±0.0073bc | 0.1593±0.0116ab | 0.2880±0.0191cd |
|                                 | Hemin+0.3%S | 0.1067±0.0080c | 0.1530±0.0067c  | 0.3800±0.0060e  | 0.1440±0.0046c  | 0.2070±0.0065c  | 0.3830±0.0067e  |
|                                 | 0.6%S       | 0.0770±0.0066b | 0.1093±0.0086b  | 0.2280±0.0115bc | 0.1010±0.0012ab | 0.1340±0.0071a  | 0.1713±0.0234ab |
|                                 | Hemin+0.6%S | 0.1033±0.0077c | 0.1163±0.0012c  | 0.2740±0.0300cd | 0.1453±0.0055c  | 0.2083±0.0043c  | 0.2410±0.0096bc |
|                                 | 1.2%S       | 0.0533±0.0052a | 0.0950±0.0040a  | 0.1247±0.0264a  | 0.0777±0.0062a  | 0.1507±0.0073a  | 0.1287±0.0252a  |
|                                 | Hemin+1.2%S | 0.0713±0.0041b | 0.1380±0.0055b  | 0.1750±0.0023ab | 0.1270±0.0020bc | 0.1997±0.0052c  | 0.2827±0.0181c  |

Mean ± SE of three replicates. Different letters indicate significant differences (p < 0.05)

Table S3: Effect of hemin soaking on root-shoot ratio of HYZ62 and 158R under NaCl stress

| Index                   | Treatments  | Huayouza 62    |                 |                 | 158R            |                 |                  |
|-------------------------|-------------|----------------|-----------------|-----------------|-----------------|-----------------|------------------|
|                         |             | 14             | 17              | 20              | 14              | 17              | 20               |
| root-shoot<br>ratio (%) | Control     | 0.1247±0.0052a | 0.1357±0.0020ab | 0.1233±0.0038ab | 0.1047±0.0055a  | 0.1230±0.0015ab | 0.1143±0.0018abc |
|                         | Hemin       | 0.1730±0.0017c | 0.1503±0.0020c  | 0.1460±0.0055c  | 0.1413±0.0009cd | 0.1433±0.0003cd | 0.1367±0.0080d   |
|                         | 0.3%S       | 0.1217±0.0038a | 0.1360±0.0021ab | 0.1327±0.0072bc | 0.1020±0.0017a  | 0.1157±0.0032a  | 0.1023±0.0009a   |
|                         | Hemin+0.3%S | 0.1580±0.0032b | 0.1390±0.0006b  | 0.1530±0.0050c  | 0.1280±0.0017bc | 0.1533±0.0059de | 0.1257±0.0019cd  |
|                         | 0.6%S       | 0.1517±0.0029b | 0.1263±0.0013a  | 0.1020±0.0032a  | 0.1163±0.0027ab | 0.1423±0.0007cd | 0.1147±0.0018abc |
|                         | Hemin+0.6%S | 0.1883±0.0027d | 0.1383±0.0026b  | 0.1167±0.0052ab | 0.1370±0.0015cd | 0.1613±0.0062e  | 0.1290±0.0006cd  |
|                         | 1.2%S       | 0.1753±0.0052c | 0.1683±0.0013d  | 0.1120±0.0136ab | 0.1513±0.0058d  | 0.1340±0.0031bc | 0.1073±0.0012ab  |
|                         | Hemin+1.2%S | 0.1940±0.0031d | 0.1723±0.0079d  | 0.1323±0.0030bc | 0.1733±0.0041e  | 0.1613±0.0032e  | 0.1217±0.0012bcd |

Mean ± SE of three replicates. Different letters indicate significant differences (p < 0.05)
